# Supplementary material
Source: Springer Nature journal article supplement (https://www.springermedizin.de/resource/supplementary/12888_2012_1208_MOESM2_ESM.pdf/9479360)

**a**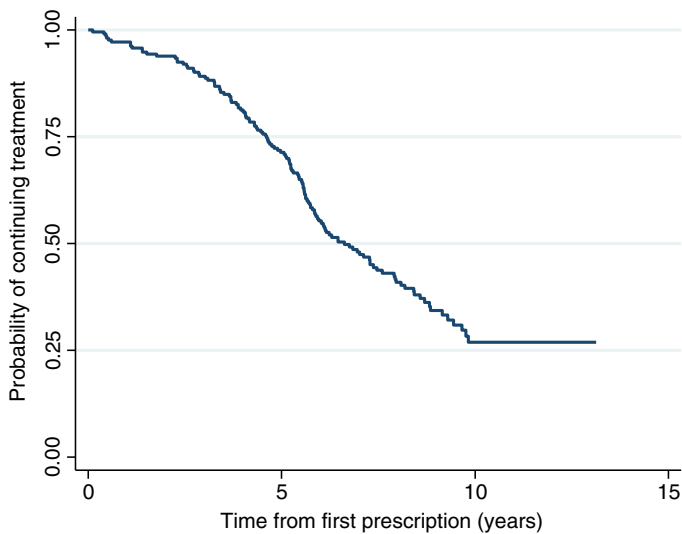

Number at risk

213

151

15

0

**b**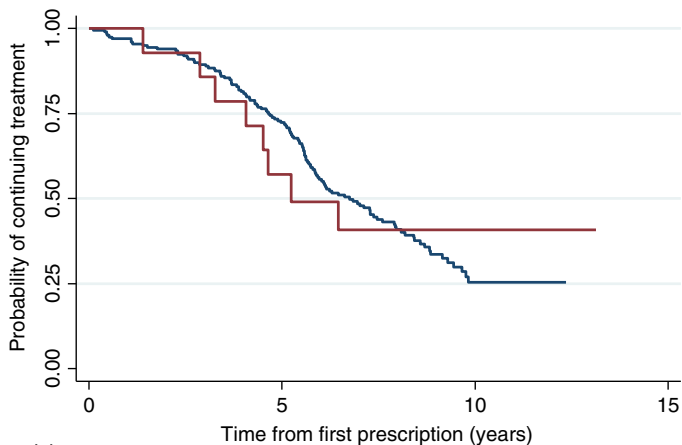

Number at risk

sex = Male 199

143

14

0

sex = Female 14

8

1

0

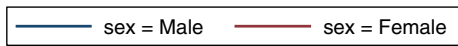

Supplement: MOESM2 [file 9479360]
